# Supplementary material for: Next-Generation Sequencing of Tissue and Circulating Tumor DNA: The UC San Diego Moores Center for Personalized Cancer Therapy Experience with Breast Malignancies
Source: Oxford University Press journal article supplement (doi:10.1158/1535-7163.mct-17-1038), 2019-03-29
Supplement: 15357163mct171038-sup-191335_4_supp_5304999_plykh1.docx [file 15357163mct171038-sup-191335_4_supp_5304999_plykh1.docx]

**Supplemental Table 3:** 70 gene panel (ctDNA) (N=10 patients)

| **Complete Exon Sequencing** | | | | | | | | | |
| --- | --- | --- | --- | --- | --- | --- | --- | --- | --- |
| **Point Mutations (SNVs)**  (70 Genes) | | | | | | **Amplifications (CNVs)**  (18 Genes) | | **Fusions**  (6 Genes) | **Indels**  (3 Genes) |
| *AKT1* | *ALK* | *APC* | *AR* | *ARAF* | *ARID1A* | *AR* | *BRAF* | *ALK* | *EGFR** |
| *ATM* | *BRAF* | *BRCA1* | *BRCA2* | *CCND1* | *CCND2* | *CCND1* | *CCND2* | *FGFR2* | *ERBB2** |
| *CCNE1* | *CDH1* | *CDK4* | *CDK6* | *CDKN2A* | *CDKN2B* | *CCNE1* | *CDK4* | *FGFR3* | *MET*** |
| *CTNNB1* | *EGFR* | *ERBB2* | *ESR1* | *EZH2* | *FBXW7* | *CDK6* | *EGFR* | *NTRK1* |  |
| *FGFR1* | *FGFR2* | *FGFR3* | *GATA3* | *GNA11* | *GNAQ* | *ERBB2* | *FGFR1* | *RET* |  |
| *GNAS* | *HNF1A* | *HRAS* | *IDH1* | *IDH2* | *JAK2* | *FGFR2* | *KIT* | *ROS1* |  |
| *JAK3* | *KIT* | *KRAS* | *MAP2K1* | *MAP2K2* | *MET* | *KRAS* | *MET* |  |  |
| *MLH1* | *MPL* | *MYC* | *NF1* | *NFE2L2* | *NOTCH1* | *MYC* | *PDGFRA* |  |  |
| *NPM1* | *NRAS* | *NTRK1* | *PDGFRA* | *PIK3CA* | *PTEN* | *PIK3CA* | *RAF1* |  |  |
| *PTPN11* | *RAF1* | *RB1* | *RET* | *RHEB* | *RHOA* |  |  |  | **exons 19 & 20*  ***exon 14 skipping* |
| *RIT1* | *ROS1* | *SMAD4* | *SMO* | *SRC* | *STK11* |  |  |  |
| *TERT* | *TP53* | *TSC1* | *VHL* |  |  |  |  |  |
